# Supplementary material for: Enabling spectral barcoding of SERS nanotags using gold nanostars
Source: Royal Society of Chemistry journal article supplement (doi:10.1039/d2me00180b), 2022-10-19
Supplement: d2me00180b1.pdf [file d2me00180b1.pdf]

## Supporting Information

### Enabling spectral barcoding of SERS nanotags using gold nanostar

Nhung Thi Tuyet Nguyen <sup>a</sup>, Mohammad Tavakkoli Yaraki <sup>a</sup>, Yuling Wang <sup>a,\*</sup>

<sup>a</sup>School of Natural Sciences, Faculty of Science and Engineering, Macquarie University,  
NSW 2109, Australia

\*Corresponding Author, A/ Prof. Yuling Wang, E-mail: [yuling.wang@mq.edu.au](mailto:yuling.wang@mq.edu.au)

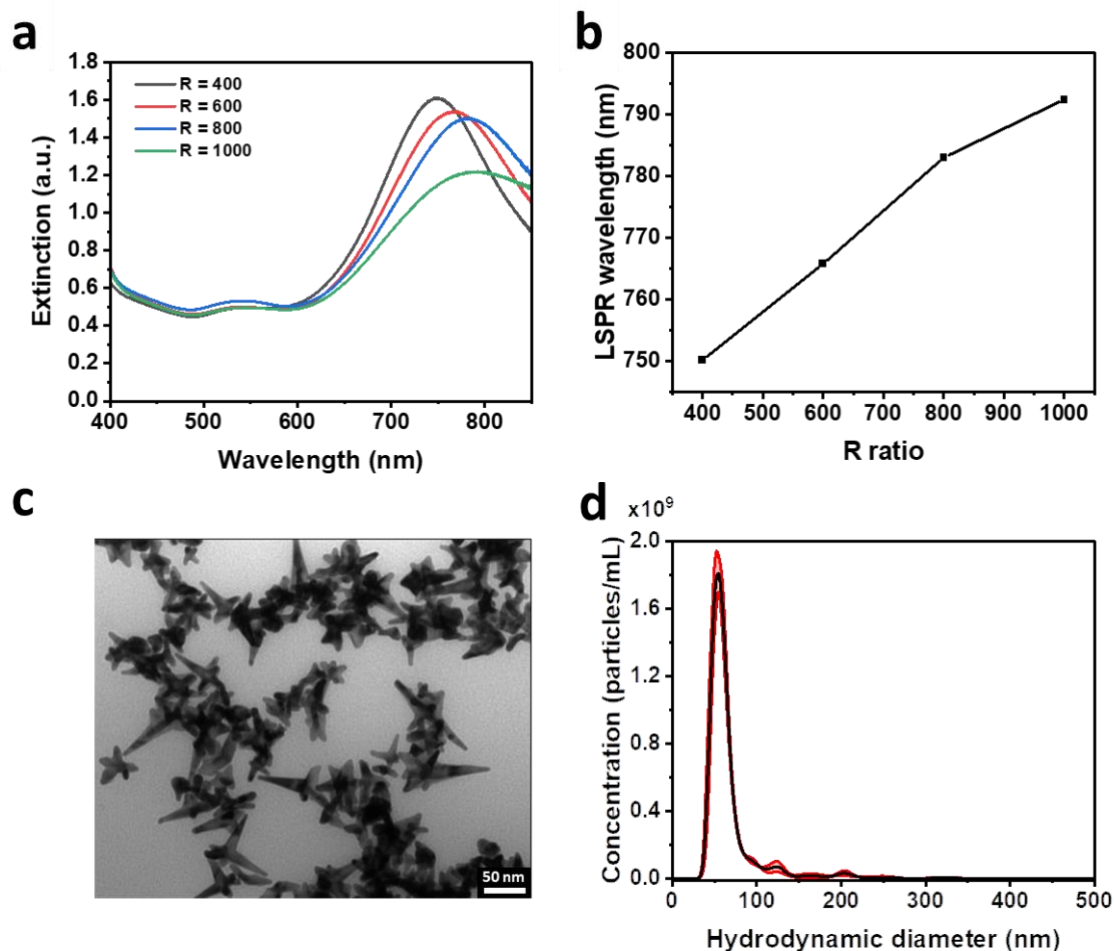

**Figure S1.** (a) UV-Vis absorption spectra of as-synthesized AuNSs with various molar ratio of HEPES to HAuCl<sub>4</sub> (R); (b) LSPR peak wavelength of the synthesized AuNS as function of R value; (c) TEM image of AuNS synthesized at the R = 800 as the LSPR wavelength of this solution was nearest to the laser excitation wavelength of 785 nm (at magnification 130,000 and applied voltage of 100 kV); (d) NTA of three replicates of AuNSs synthesized at R = 800 indicating the average hydrodynamic diameter of each AuNS at  $53.5 \pm 2.3$  nm and the average concentration of AuNSs at  $(4.99 \pm 0.06) \times 10^{10}$  particles/mL.

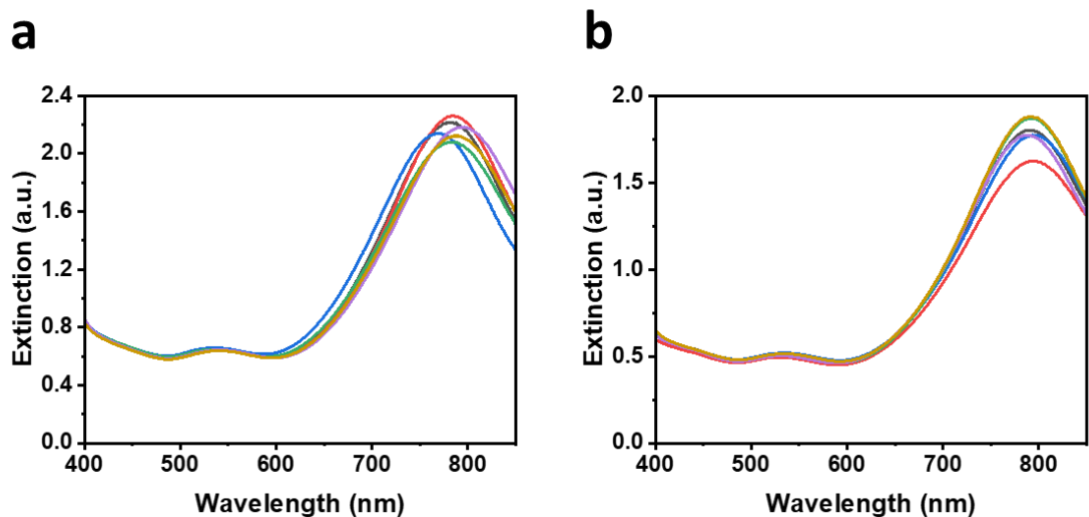

**Figure S2.** UV-Vis spectra of synthesized AuNSs in different volumes of batches. Reproducibility of synthesized AuNSs as changing the batch size from 10 mL to 20 mL with six vials of AuNS solution at each size. LSPR wavelengths of 10 mL batches and 20 mL batches were in range of 775 – 795 nm (a) and 788 – 794 nm (b).

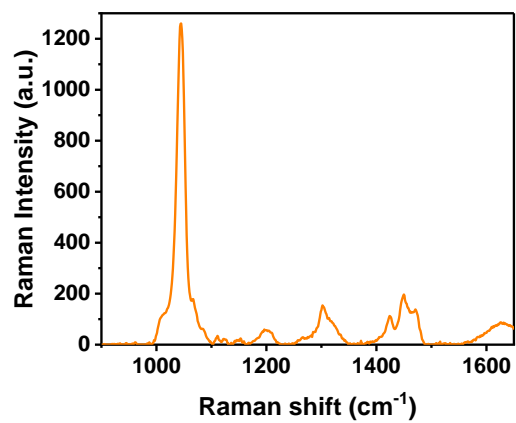

**Figure S3.** Raman spectrum of 0.2 M of HEPES solution using laser excitation of 785 nm.

**Table S1.** Band assignments to the Raman fingerprint of HEPES<sup>1-3</sup>

| Molecular structure                                                                                                                     | Raman shift (cm <sup>-1</sup> ) | Assignment                                     |
|-----------------------------------------------------------------------------------------------------------------------------------------|---------------------------------|------------------------------------------------|
| 4-(2-hydroxyethyl)-1-piperazineethanesulfonic acid<br>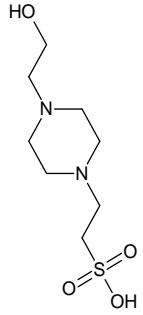 | 1045                            | SO <sub>3</sub> <sup>-</sup> symmetric stretch |
|                                                                                                                                         | 1196                            | C-N stretch                                    |
|                                                                                                                                         | 1302                            | CH <sub>2</sub> twist                          |
|                                                                                                                                         | 1424                            | CH <sub>2</sub> deformation                    |
|                                                                                                                                         | 1450                            | CH <sub>2</sub> scissor                        |
|                                                                                                                                         | 1625                            | H-O-H bend                                     |

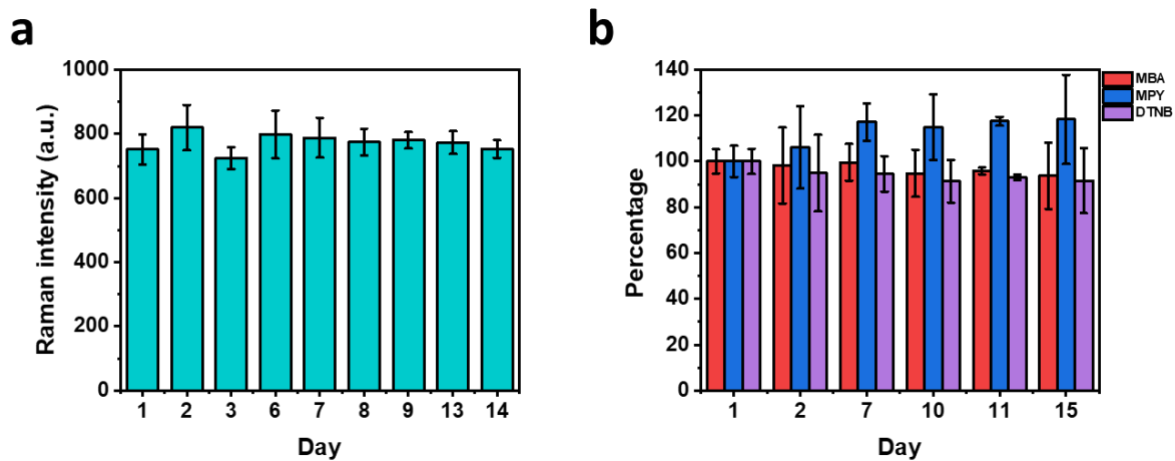

**Figure S4.** Stability of AuNS@TFMBA (a) and a mixture of three SERS nanotags (b) (AuNS@MBA, AuNS@MPY, and AuNS@DTNB) over two weeks. Raman intensity of each replicate was normalized by its extinction peak intensity then compared to the value on the first day to calculate the percentage. (Error bar stands for three replicates)

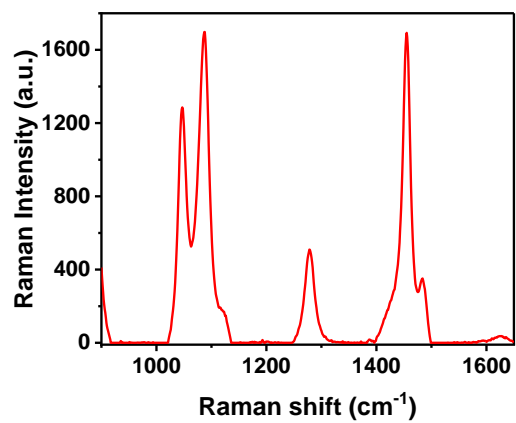

**Figure S5.** Raman spectrum of 1 M of TFMB in ethanol.

### SI-1. Enhancement factor estimation of AuNSs

The diameter (d) and the pathlength (h) of the laser spot in the liquid: d = 40 μm, h = 10 mm.

$$V_{\text{laser spot}} = \pi \left(\frac{d}{2}\right)^2 \cdot h = \pi (20 \mu\text{m})^2 \cdot 10 \text{ mm} = 1.26 \times 10^{-5} \text{ cm}^3$$

#### For SERS

As can be seen in **Figure 3b**, the SERS intensity of AuNS@TFMBA increases with increasing the concentration of TFMBA, where it reaches a plateau at concentration about 0.9 mM. It means that 5 μl of TFMBA 0.9 mM could be enough for coating 1 mL of AuNS dispersion.

Thus, number of TFMBA molecules in 1 mL AuNSs solution:

$$\begin{aligned} N_{TFMBA} (AuNS@TFMBA) &= (0.9 \text{ mM} \times 5 \mu\text{L}) \times N_A \\ &= \left(0.9 \times 10^{-3} \frac{\text{mol}}{\text{L}}\right) \times (5 \times 10^{-6} \text{ L}) \times \left(6.02 \times 10^{23} \frac{\text{molecules}}{\text{mol}}\right) \\ &= 2.71 \times 10^{15} \text{ molecules} \end{aligned}$$

Number of TFMBA molecules in laser spot:

$$\begin{aligned} N_{SERS} (AuNS@TFMBA) &= V_{\text{laser spot}} \cdot \frac{N_{TFMBA} (AuNS@TFMBA)}{1 \text{ mL}} \\ &= 1.26 \times 10^{-5} \text{ cm}^3 \cdot \frac{2.71 \times 10^{15} \text{ molecules}}{1 \text{ mL}} = 3.41 \times 10^{10} \text{ molecules} \end{aligned}$$

$$I_{SERS} (AuNS@TFMBA) = 635.31$$

#### For Raman

Concentration of TFMBA for reference: 1 M = 1 mol/L

Number of TFMBA molecules in 1L:  $N'_{TFMBA} = 6.02 \times 10^{23}$  molecules

Thus, number of TFMBA in laser spot:

$$\begin{aligned} N_{Raman} &= V_{\text{laser spot}} \cdot \frac{N'_{TFMBA}}{1 \text{ L}} = 1.26 \times 10^{-5} \text{ cm}^3 \cdot \frac{6.02 \times 10^{23} \text{ molecules}}{1 \text{ L}} \\ &= 1.26 \times 10^{-5} \text{ cm}^3 \cdot \frac{6.02 \times 10^{23} \text{ molecules}}{1000 \text{ cm}^3} = 7.59 \times 10^{15} \text{ molecules} \end{aligned}$$

$$I_{Raman} = 5863.85$$

Overall, EF of AuNS after conjugation with TFMBA can be calculated as below:

$$\begin{aligned} EF (AuNS) &= \frac{I_{SERS} (AuNS@TFMBA)}{I_{Raman}} \cdot \frac{N_{Raman}}{N_{SERS} (AuNS@TFMBA)} \\ &= \frac{635.31}{5863.85} \cdot \frac{7.59 \times 10^{15} \text{ molecules}}{3.41 \times 10^{10} \text{ molecules}} = 2.41 \times 10^4. \end{aligned}$$



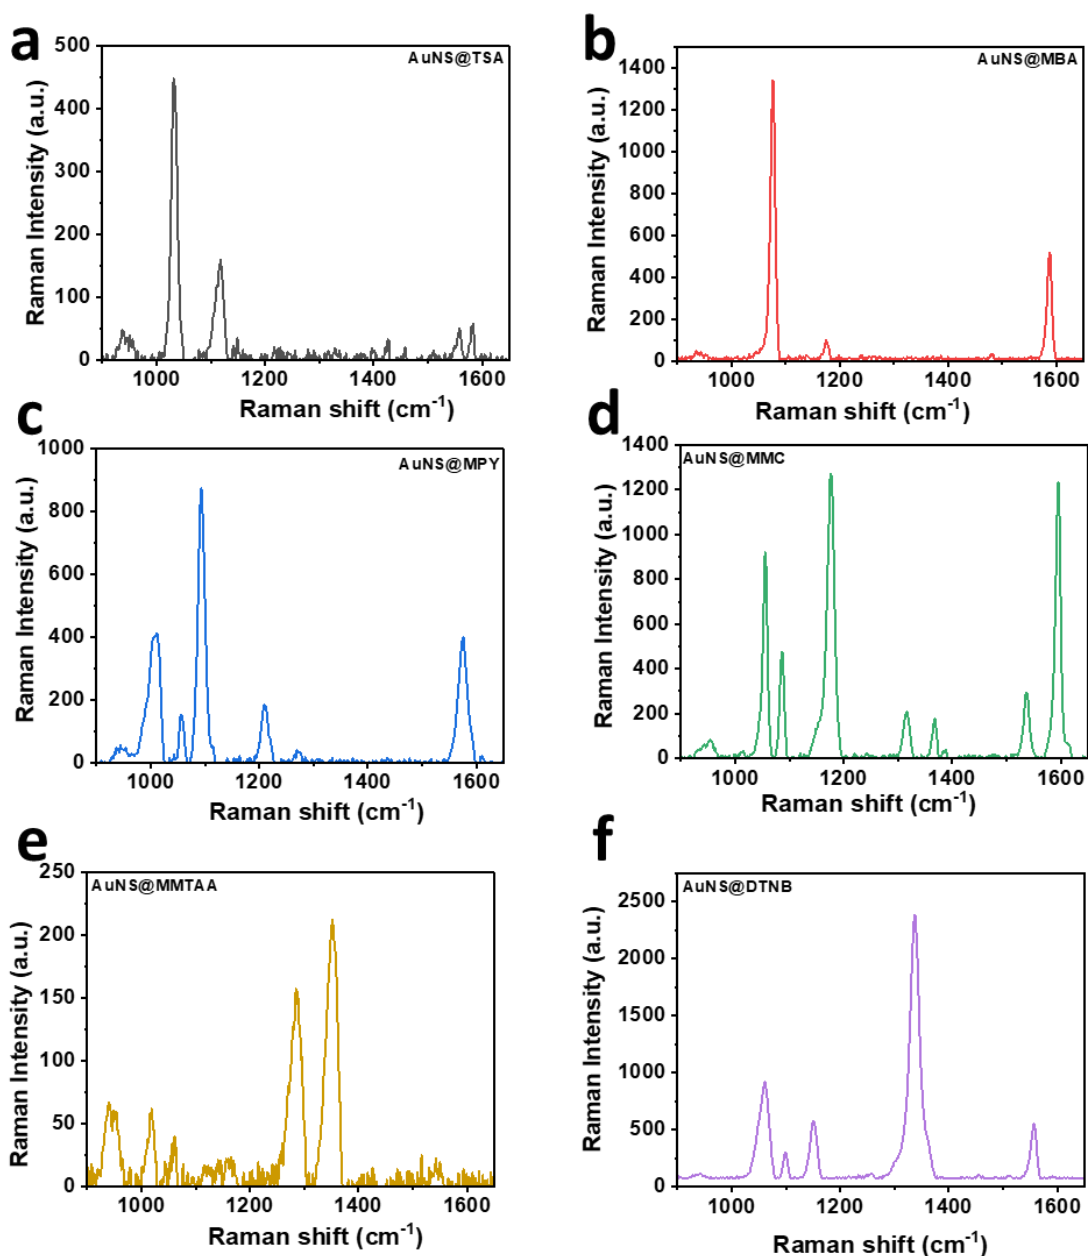

**Figure S6.** SERS spectra of AuNS coated with seven Raman reporter molecules. The most significant peak of each SERS nanotag was recorded, including (a)  $1032\text{ cm}^{-1}$  of AuNS@TSA (b)  $1077\text{ cm}^{-1}$  of AuNS@MBA (c)  $1093\text{ cm}^{-1}$  AuNS@MPY (d)  $1176\text{ cm}^{-1}$  of AuNS@MMC (e)  $1351\text{ cm}^{-1}$  of AuNS@MMTAA (f)  $1337\text{ cm}^{-1}$  of AuNS@DTNB (g)  $1378\text{ cm}^{-1}$  of AuNS@TFMBA

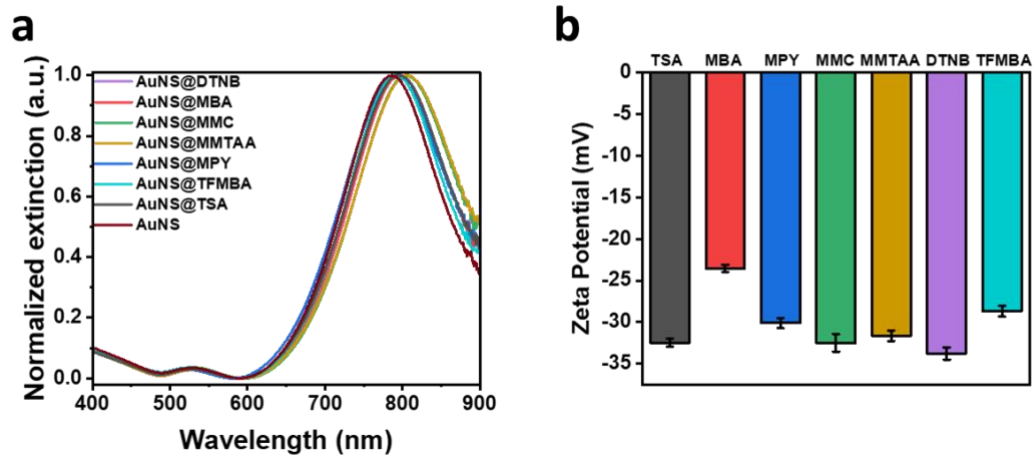

**Figure S7.** UV-Vis spectra (a) and zeta potential (b) of seven different SERS nanotags. UV-Vis spectra of AuNSs presented red shifts after conjugation with Raman reporter molecules (a) and all SERS nanotags had negative charges (b)



**Table S2.** 21 SERS spectra of two types of SERS nanotags

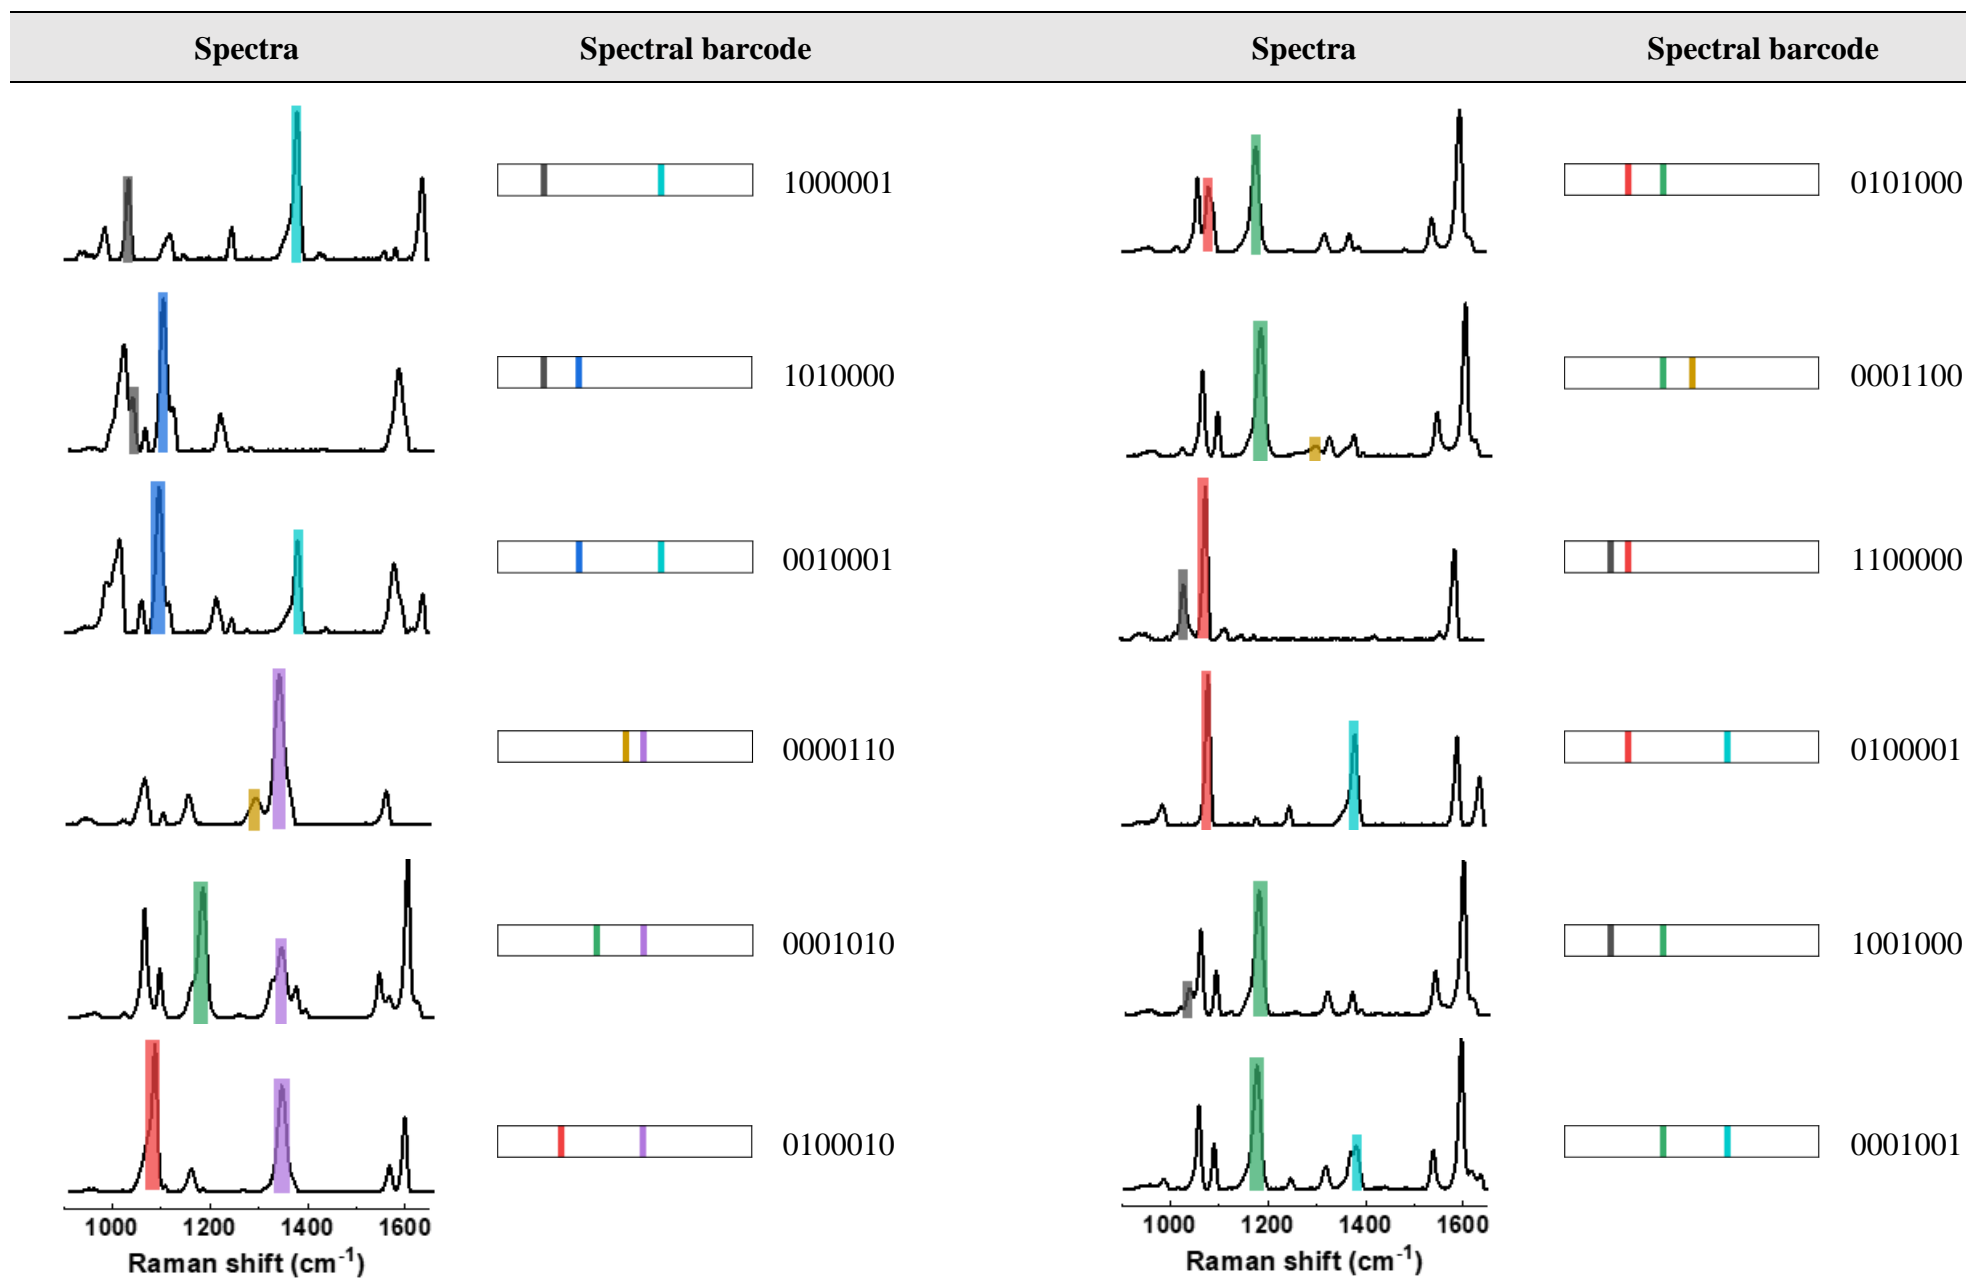

**Table S2.** 21 SERS spectra of two types of SERS nanotags (continued)

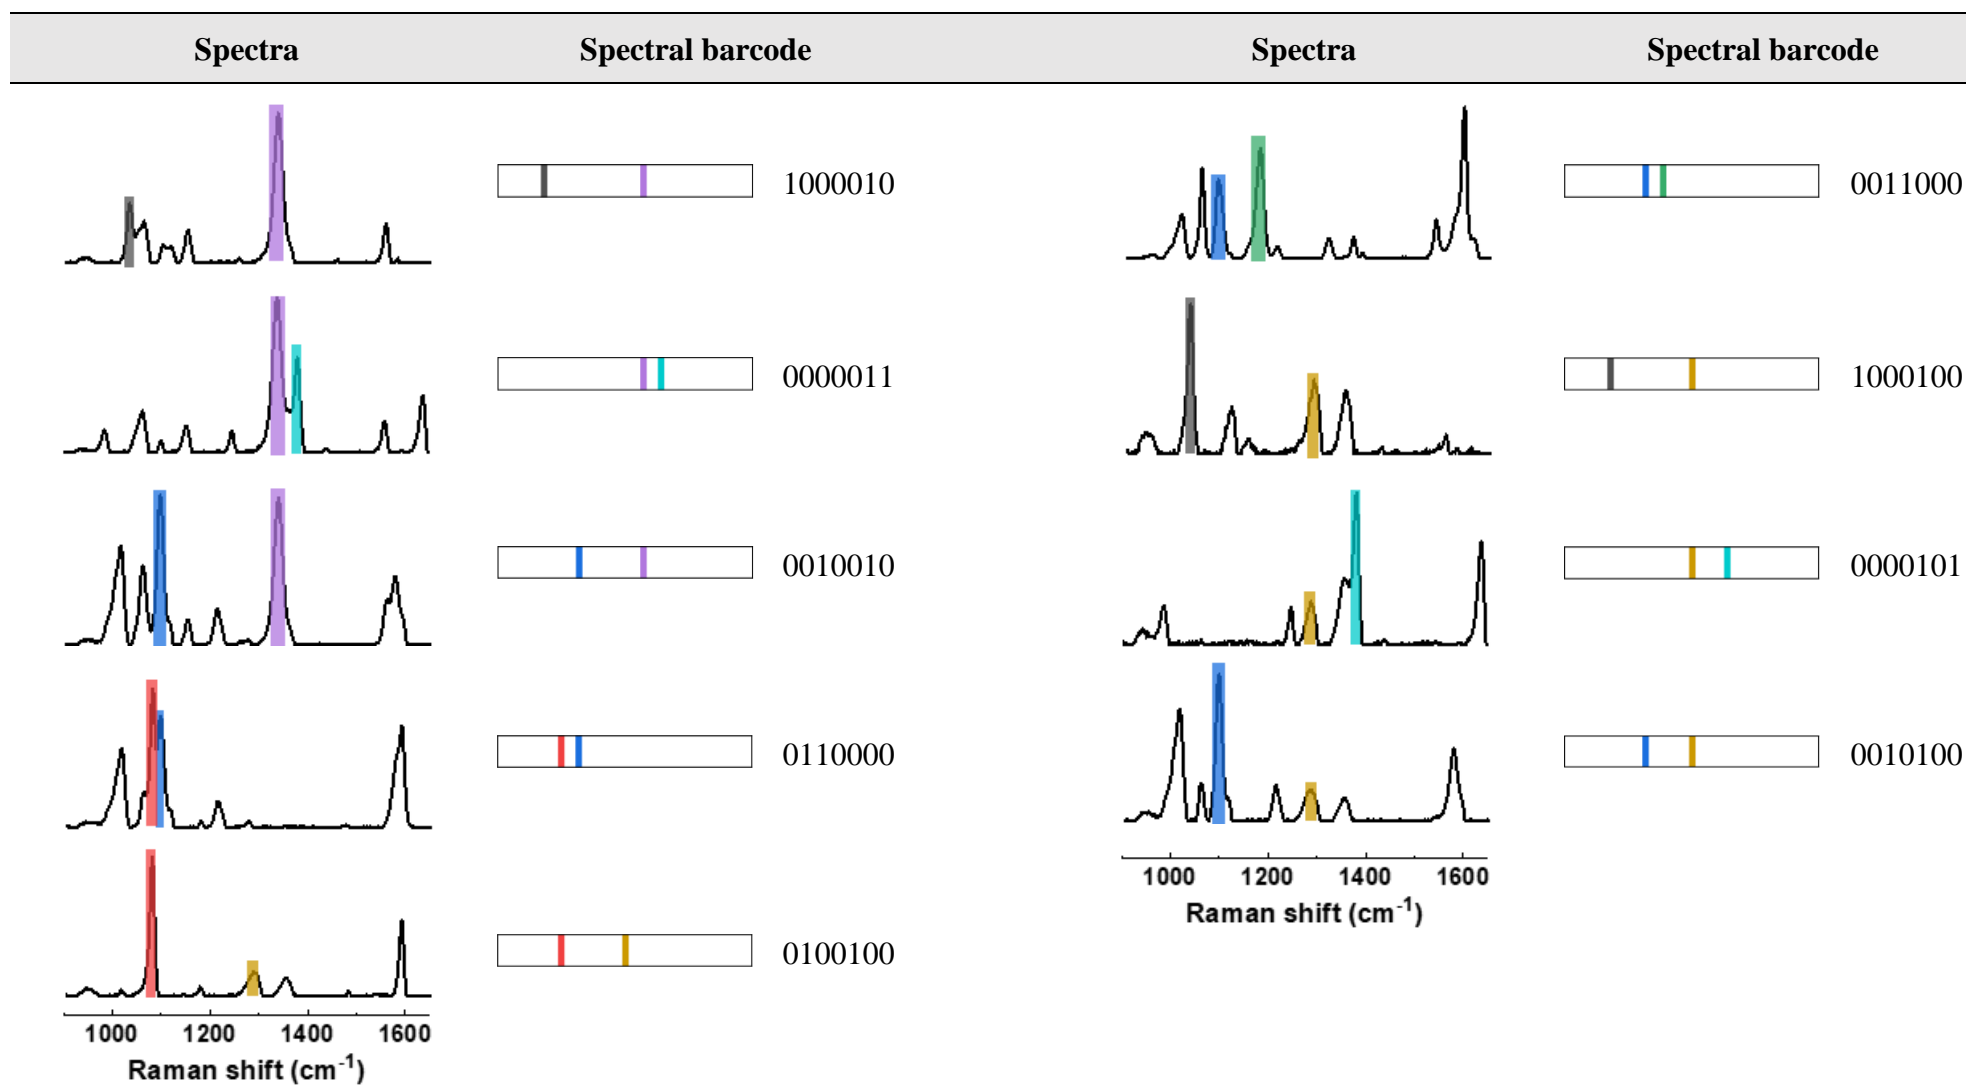

**Table S3.** 35 SERS spectra of three types of SERS nanotags

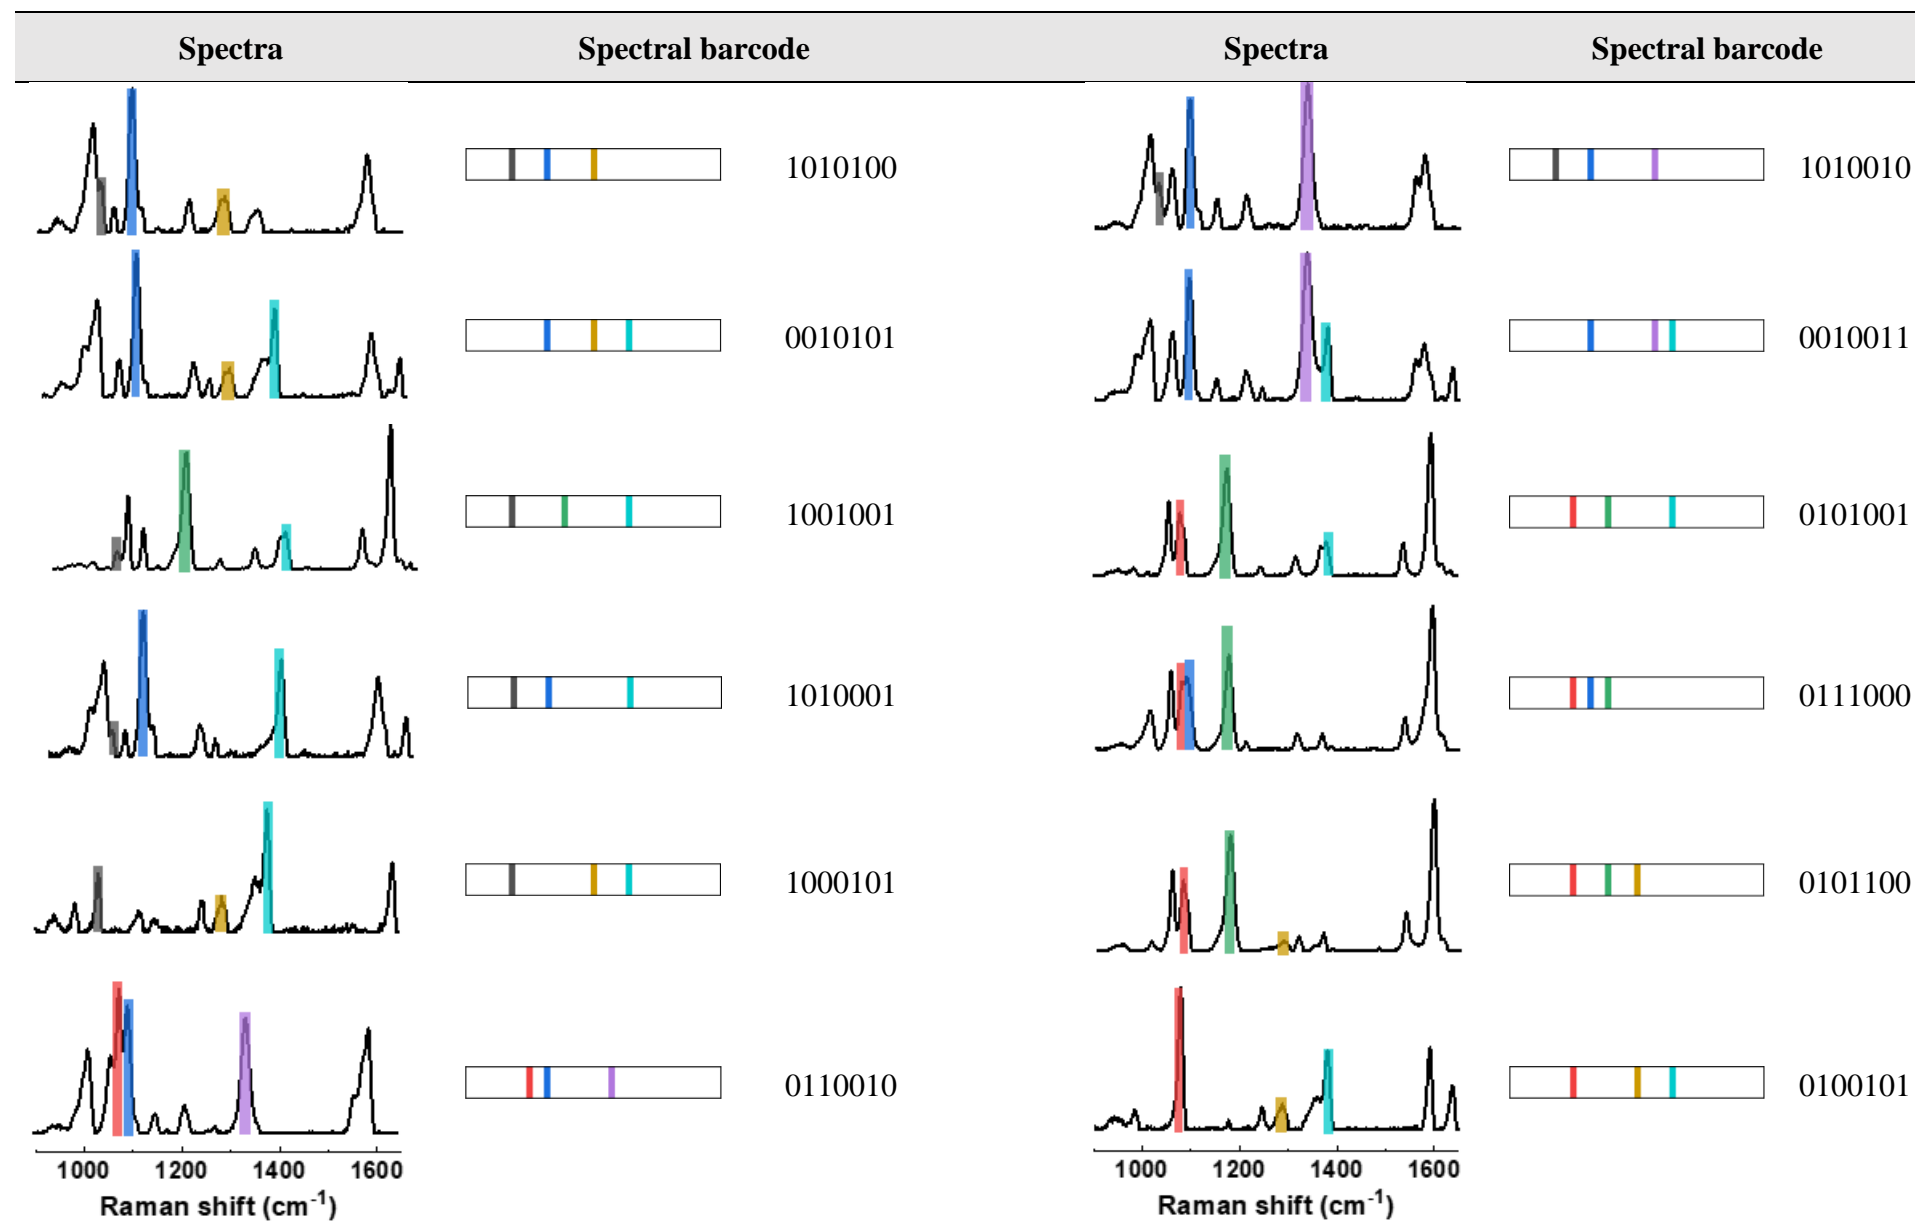

**Table S3.** 35 SERS spectra of three types of SERS nanotags (continued)

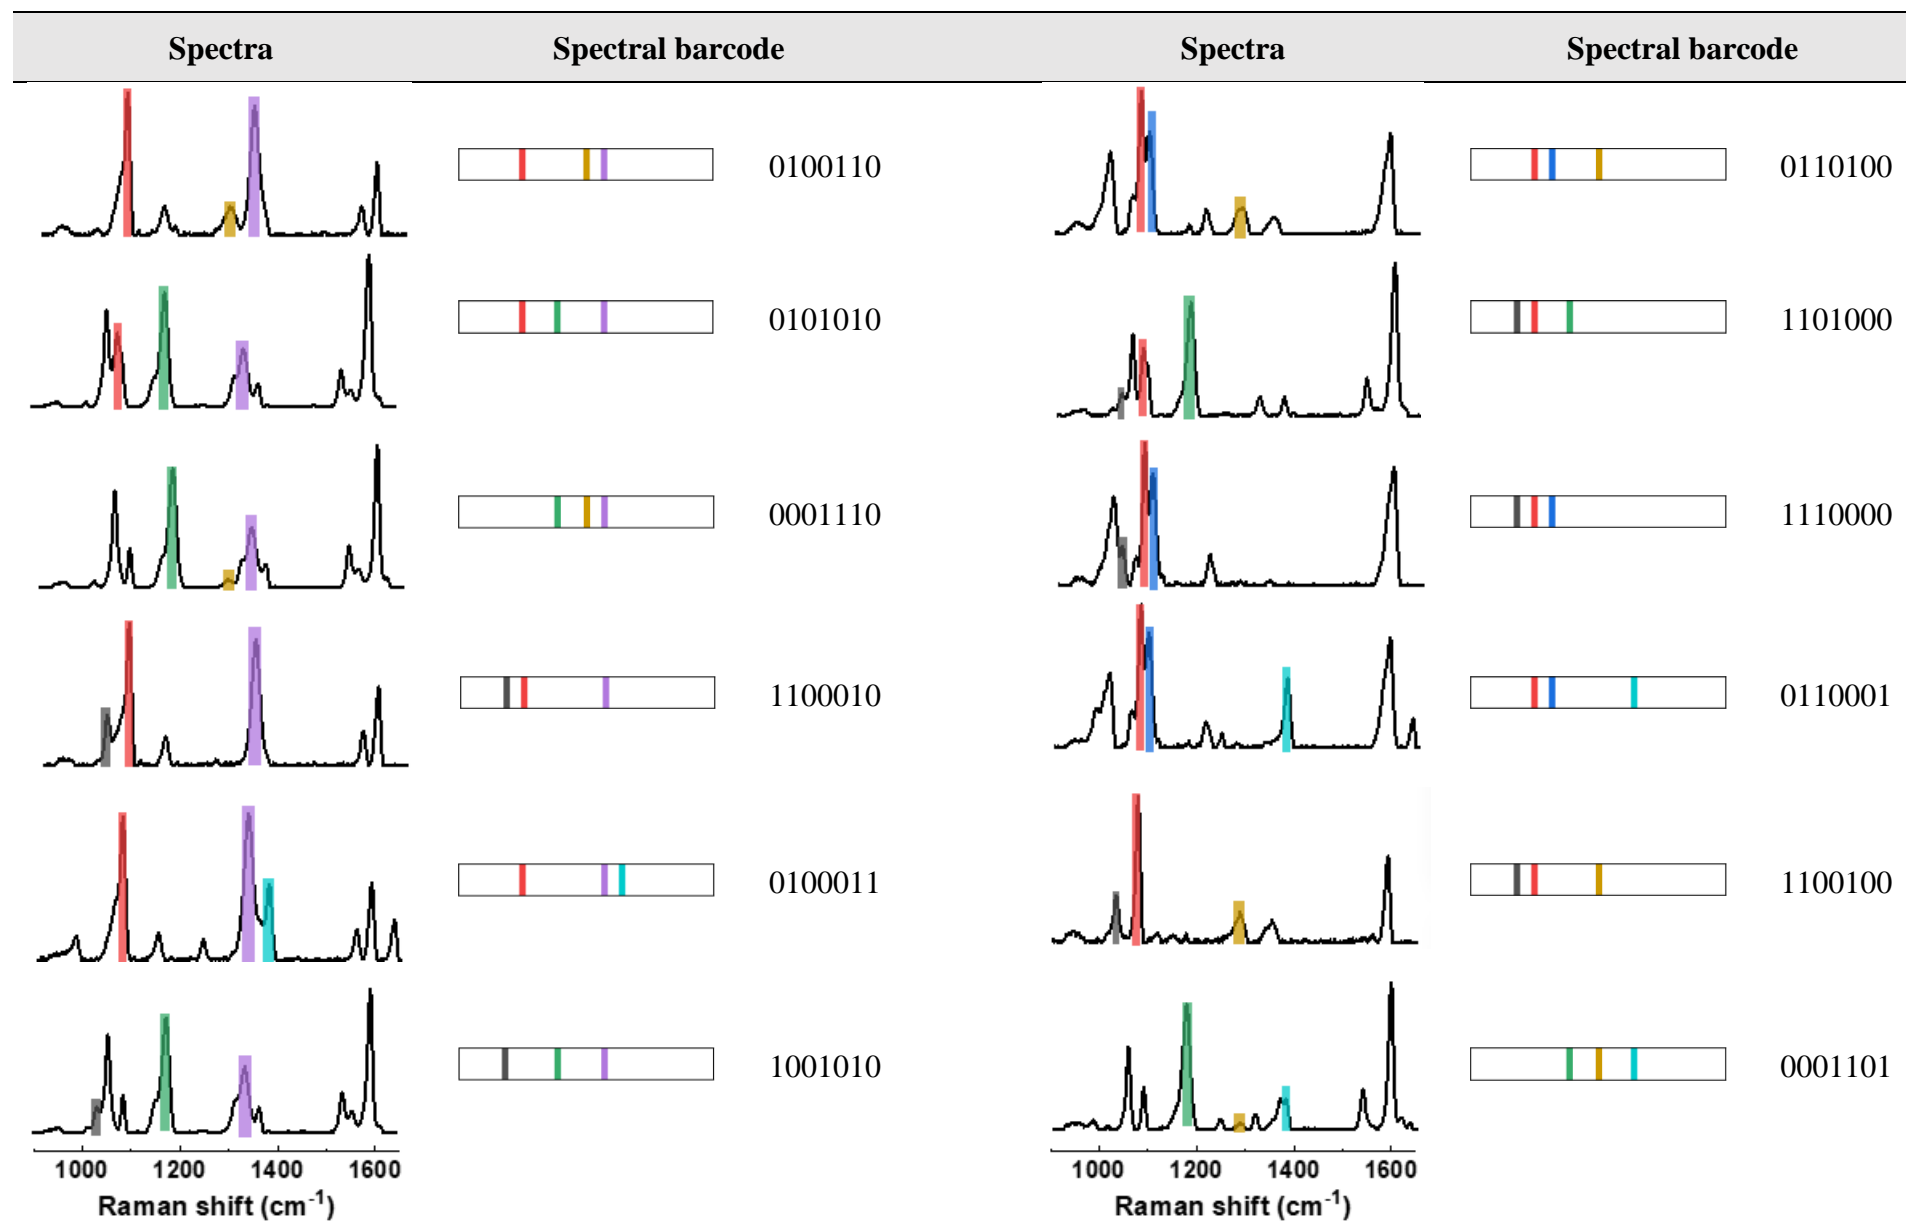

**Table S3.** 35 SERS spectra of three types of SERS nanotags (continued)

| Spectra                                                                             | Spectral barcode                                                                    |         | Spectra                                                                               | Spectral barcode                                                                      |
|-------------------------------------------------------------------------------------|-------------------------------------------------------------------------------------|---------|---------------------------------------------------------------------------------------|---------------------------------------------------------------------------------------|
| 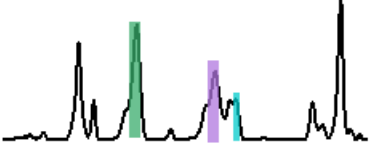   |    | 0001011 |    |    |
|    |    | 0011010 |    |    |
|    |    | 1000110 |    |    |
|    |    | 0000111 |    |    |
|   |  | 0010110 |   |  |
|  |  | 1000011 |  |  |

1000 1200 1400 1600  
Raman shift (cm<sup>-1</sup>)



**Table S4.** 35 SERS spectra of four types of SERS nanotags

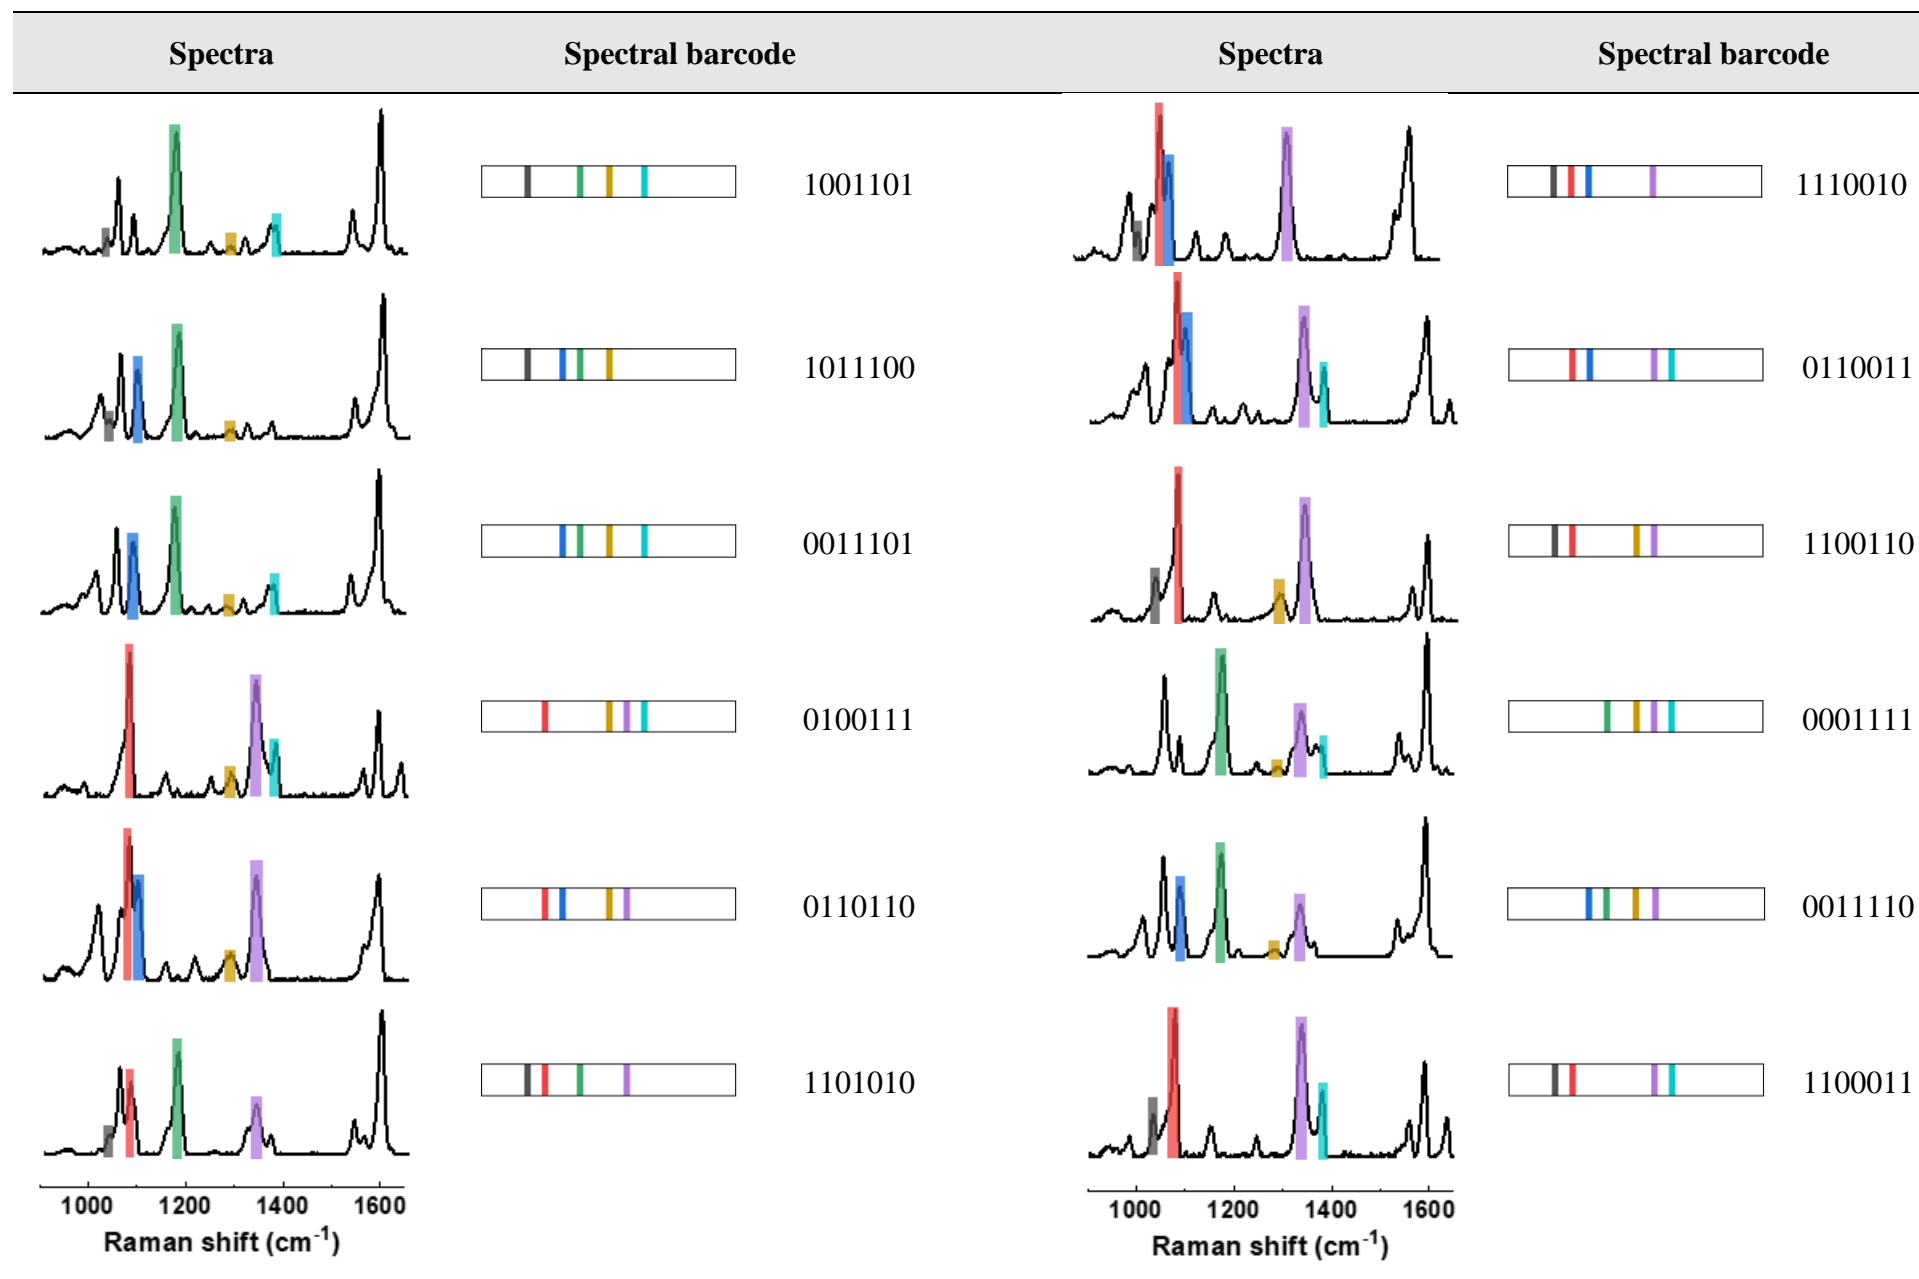

**Table S4.** 35 SERS spectra of four types of SERS nanotags (continued)

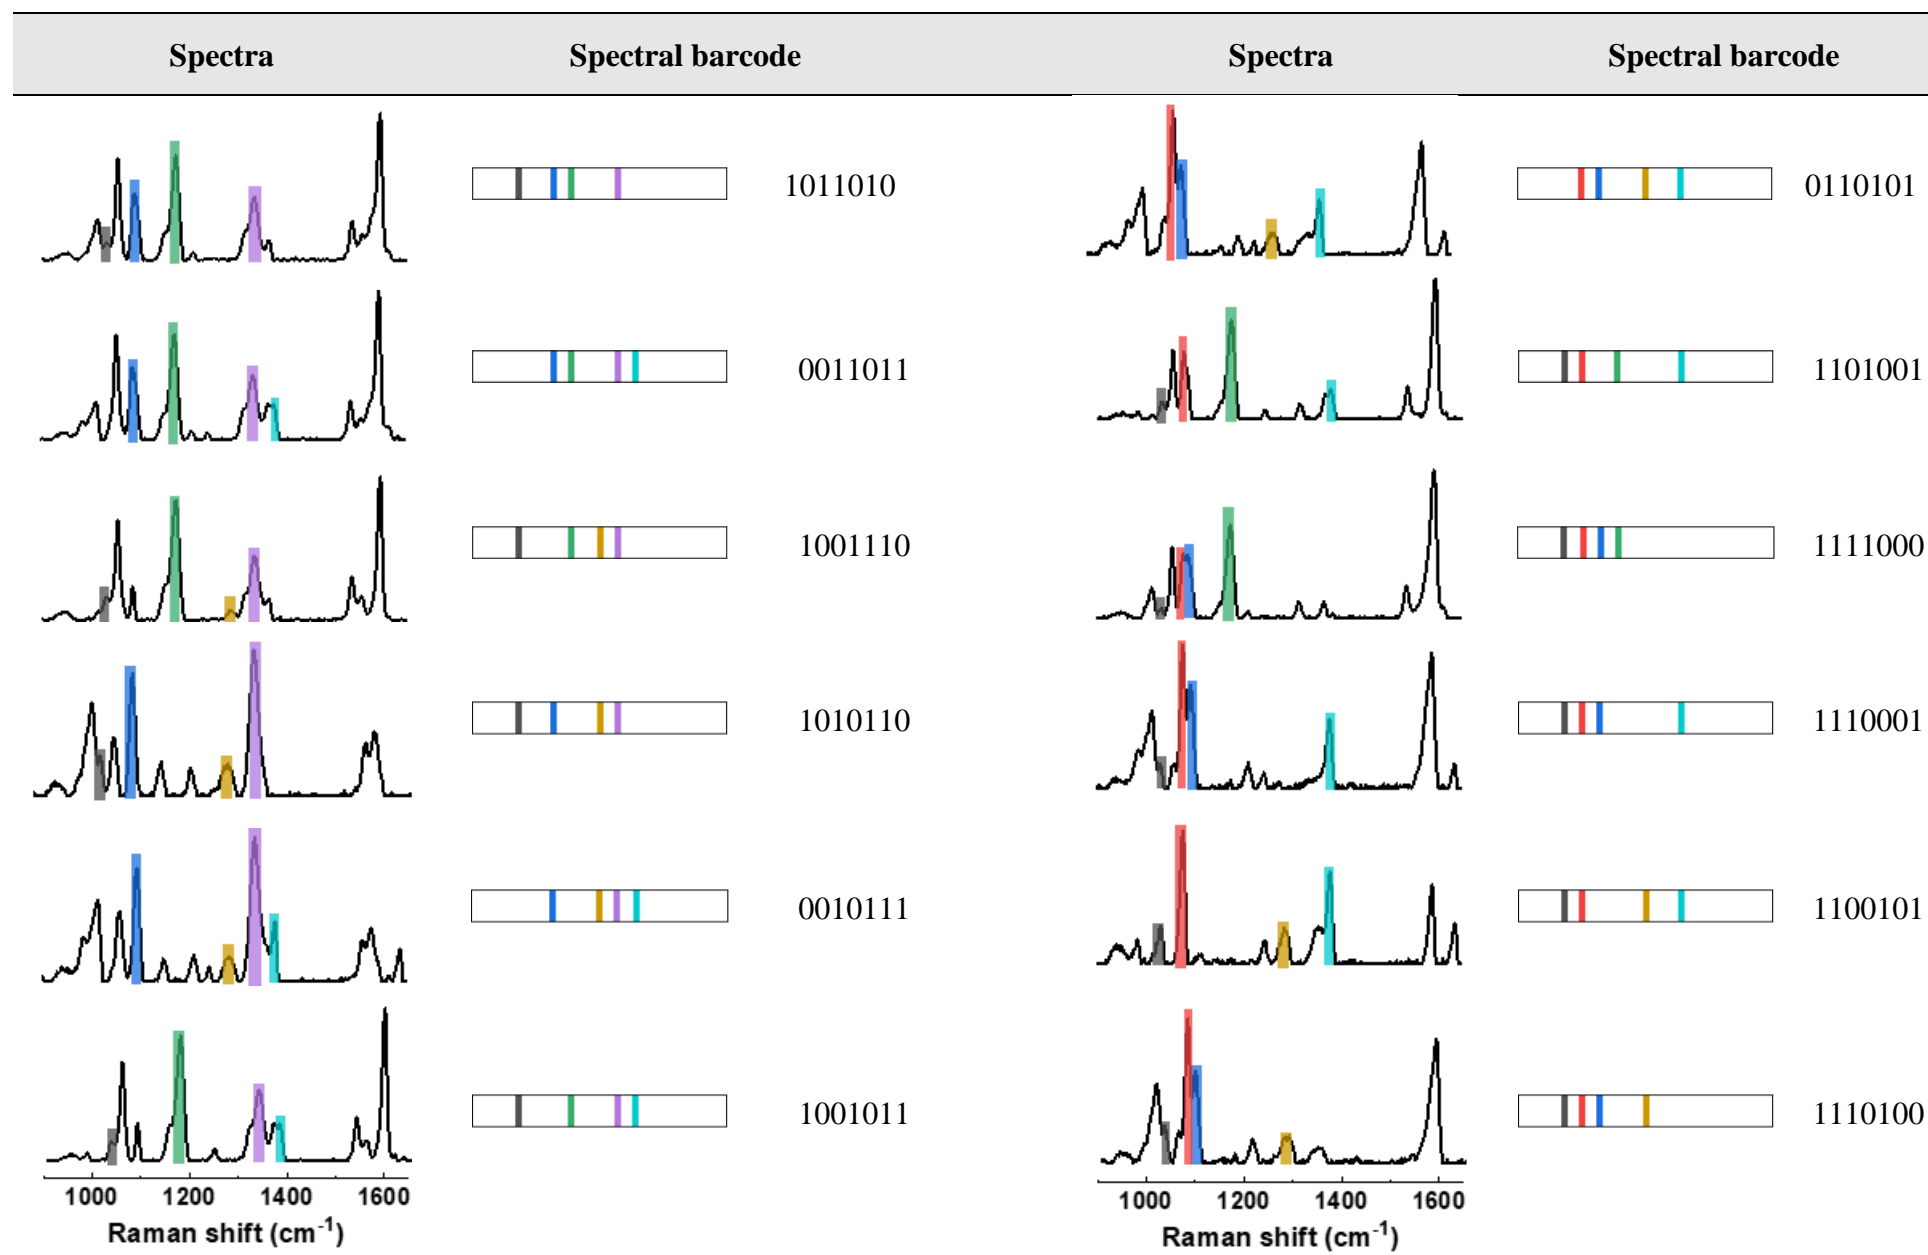

**Table S4.** 35 SERS spectra of four types of SERS nanotags (continued)

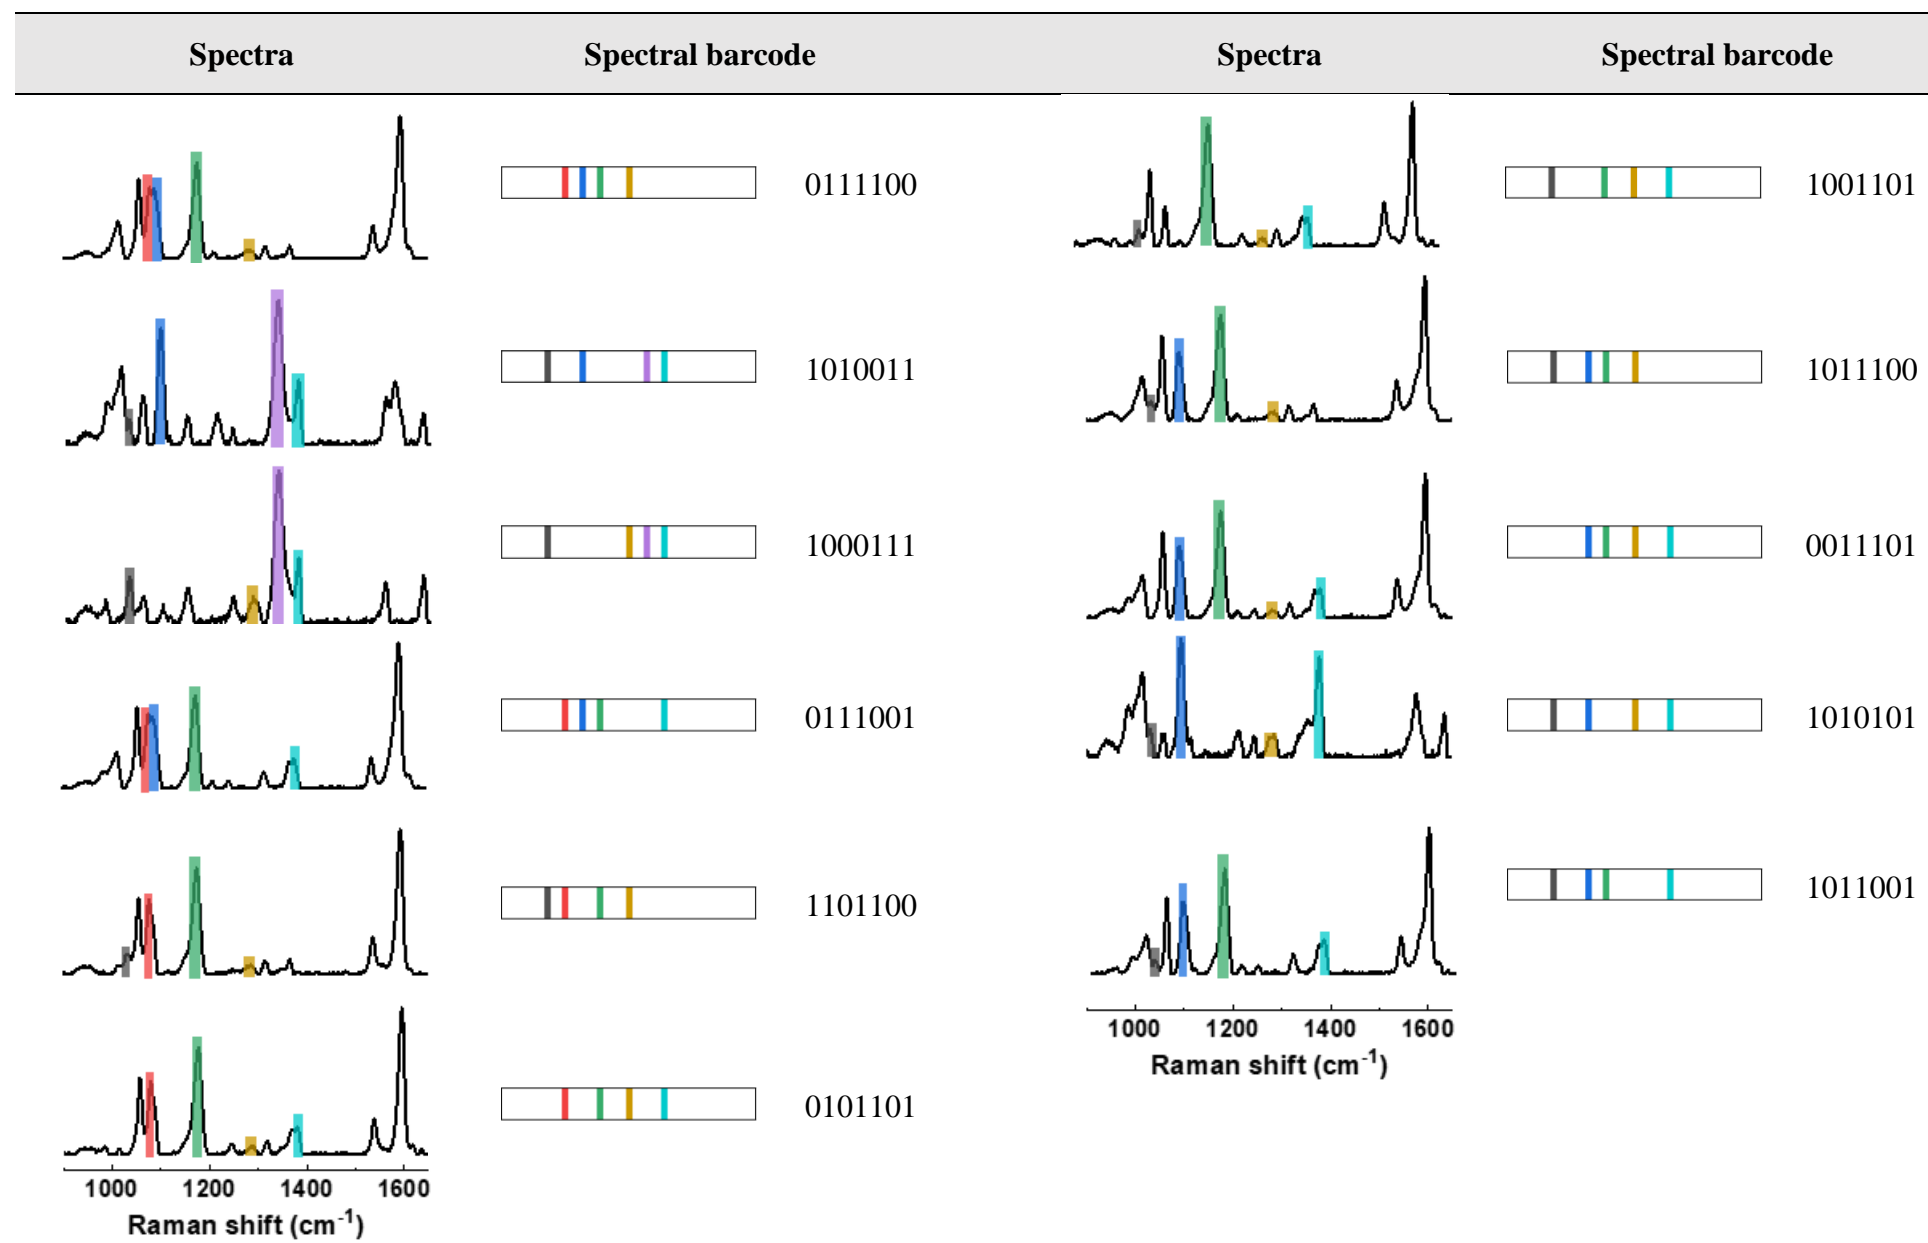

**Table S5.** 21 SERS spectra of five types of SERS nanotags

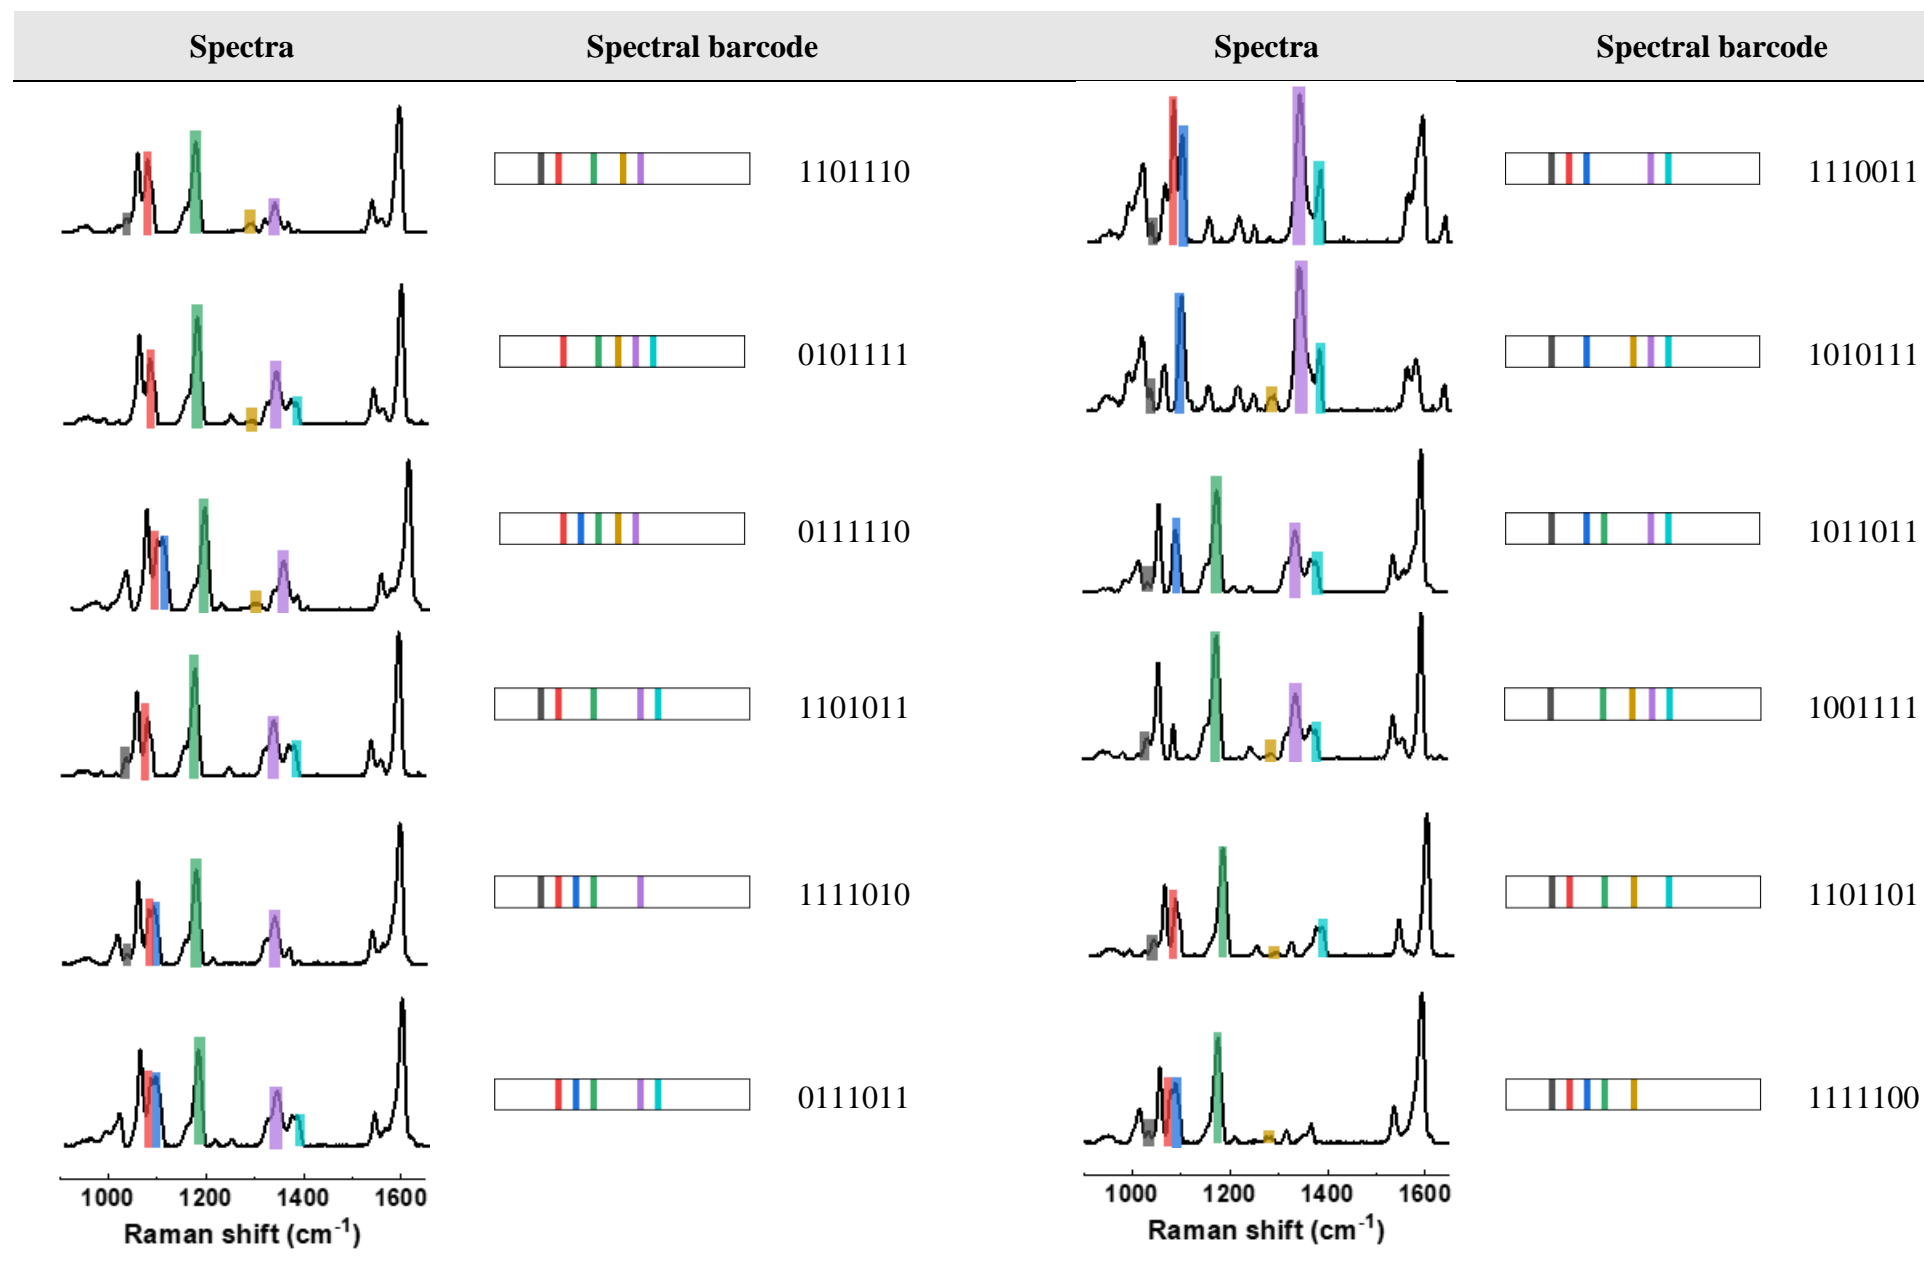

**Table S5.** 21 SERS spectra of five types of SERS nanotags (continued)

| Spectra                                                                             | Spectral barcode                                                                            | Spectra                                                                             | Spectral barcode                                                                                   |
|-------------------------------------------------------------------------------------|---------------------------------------------------------------------------------------------|-------------------------------------------------------------------------------------|----------------------------------------------------------------------------------------------------|
| 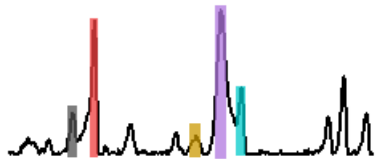   |  1100111   |  |  0111101        |
|    |  1110110   |  |  1110101        |
|    |  0110111   |  |  <b>1011101</b> |
|   |  1011110   |  |  1111001        |
|  |  0011111 |                                                                                     |                                                                                                    |

1000 1200 1400 1600  
Raman shift (cm<sup>-1</sup>)

## References

1. G. Socrates, *Infrared and Raman characteristic group frequencies: tables and charts*, John Wiley & Sons Ltd, Third edn., 2001.
2. W. Xi and A. J. Haes, *J Am Chem Soc*, 2019, **141**, 4034-4042.
3. A. A. Kananenka and J. L. Skinner, *J Chem Phys*, 2018, **148**, 244107.
